# Supplementary material for: Effects of Long-Term Fenofibrate Treatment on Markers of Renal Function in Type 2 Diabetes
Source: Oxford University Press journal article supplement (doi:10.2337/dc09-0621), 2009-10-21
Supplement: dc09-0621_online_appendix.pdf [file dc09-0621_online_appendix.pdf]

**Supplementary table 1.** Medication at baseline and at 5<sup>th</sup> year.

|                              | Baseline | 5th yr   | Baseline    | 5th yr      |         |
|------------------------------|----------|----------|-------------|-------------|---------|
|                              | Placebo  | Placebo  | Fenofibrate | Fenofibrate | P-value |
|                              | (n=83)   | (n=83)   | (n=87)      | (n=87)      |         |
| Antihypertensive medication  | 43 (52%) | 66 (80%) | 33 (38%)    | 63 (72%)    | NS      |
| ACE-inhibitors               | 26 (31%) | 32 (39%) | 19 (22%)    | 29 (33%)    | NS      |
| ARBs                         | 4 (5%)   | 27 (33%) | 2 (2%)      | 22 (25.3%)  | NS      |
| Beta-blockers                | 17 (21%) | 23 (28%) | 25 (29%)    | 32 (37%)    | 0.009   |
| Ca-blockers                  | 22 (27%) | 34 (41%) | 17 (20%)    | 24 (28%)    | NS      |
| Diuretics                    | 21 (25%) | 33 (40%) | 17 (20%)    | 31 (36%)    | NS      |
| Nitrates                     | 4 (5%)   | 4 (5%)   | 4 (5%)      | 11 (13%)    | 0.023   |
| ASA                          | 48 (58%) | 70 (84%) | 61 (70%)    | 78 (90%)    | 0.001   |
| Antihyperglycaemic treatment |          |          |             |             |         |
| Diet only                    | 14 (17%) | 6 (7%)   | 11 (13%)    | 4 (5%)      | NS      |
| Oral agents                  | 55 (66%) | 44 (53%) | 56 (64%)    | 42 (48%)    | 0.010   |
| Insulin only                 | 3 (4%)   | 6 (7%)   | 3 (3%)      | 8 (9%)      | NS      |
| Combination                  | 11 (13%) | 27 (33%) | 17 (20%)    | 33 (38%)    | 0.030   |

ARB, angiotensin receptor blocker.

Data are N (%) and p-value from 2X2 likelihood ratio –test for transition matrices.
